# Supplementary material
Source: publisher site journal article supplement (https://www.dovepress.com/article/246656)
Supplement: Supplementary file 1 [file get_supplementary_file.php]

# Advanced Interdisciplinary Emergency Ultrasound Workshop 2019

## Observed Structured Clinical Exam Assessment Form

**Station: Focused Cardiac Ultrasound**

**Trainee Name:** \_\_\_\_\_

**Designation:** \_\_\_\_\_

| Pre-scan                                |                                     |             |         |                | (Y/N/NA)      |
|-----------------------------------------|-------------------------------------|-------------|---------|----------------|---------------|
| 1                                       | Turned on machine                   |             |         |                |               |
| 2                                       | Positioned machine properly         |             |         |                |               |
| 3                                       | Positioned patient properly         |             |         |                |               |
| 5                                       | Cleaned hands prior to scan         |             |         |                |               |
| 6                                       | Cleaned probes prior to scan        |             |         |                |               |
| CARDIAC ULTRASOUND                      |                                     |             |         |                | (Y/N/NA)      |
| Scanning                                | Position                            | Orientation | Anatomy | Interpretation | Image quality |
| Parasternal Long Axis View              |                                     |             |         |                |               |
| Parasternal Short Axis View             |                                     |             |         |                |               |
| Apical 4 chamber View                   |                                     |             |         |                |               |
| Subcostal view                          |                                     |             |         |                |               |
| Evaluation of Left ventricular function |                                     |             |         |                |               |
| Evaluation of Right heart               |                                     |             |         |                |               |
| Assessment of Regional Wall Motion      |                                     |             |         |                |               |
| Pericardial effusion and tamponade      |                                     |             |         |                |               |
| Inferior Vena Cava                      |                                     |             |         |                |               |
| Post-scan                               |                                     |             |         |                | (Y/N/NA)      |
| 1                                       | Cleaned probes                      |             |         |                |               |
| 2                                       | Placed probes safely                |             |         |                |               |
| 3                                       | Communicated with simulated patient |             |         |                |               |

# Pretest form

Dear Participants we look forward to fruitful learning experience! Kindly fill in the form to reflect your knowledge before the workshop. The information provided will be confidential!

**\*Required**

1. Email address \*

---

2. The probe shown in the figure is NOT appropriate for which one of the following types of scans? \*

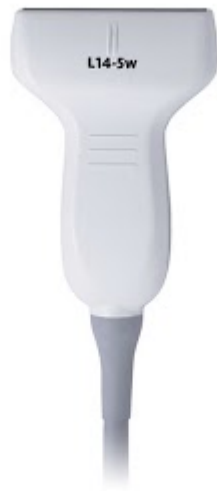

*Mark only one oval.*

- E-FAST
- Musculoskeletal
- Procedural guidance
- Ocular
- Dont Know

3. Which step will improve image resolution the most? Please select the CORRECT response. \*

*Mark only one oval.*

- Increasing the depth
- Reducing the frequency
- Moving your point of interest to the lower part of the screen
- Increasing the frequency
- Don't know

4. What is the artefact that is evident in this image which is marked as a blue dot? \*

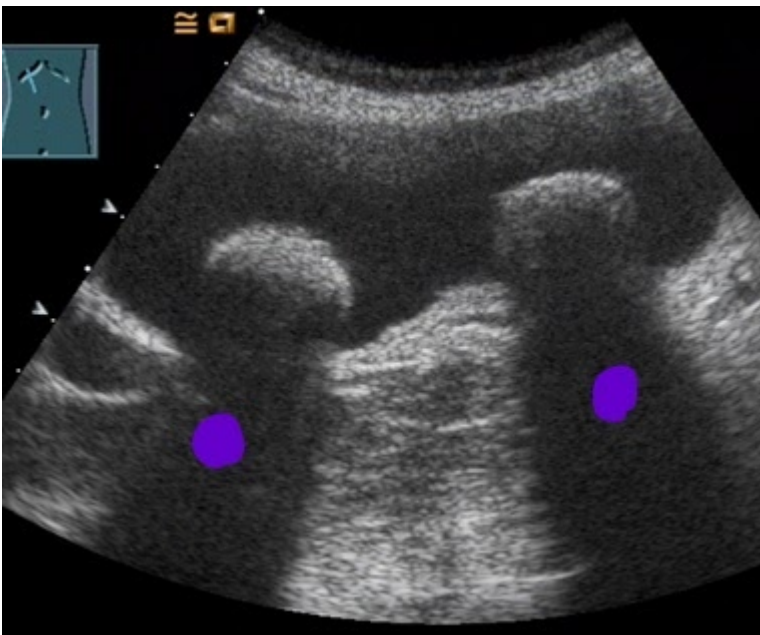

*Mark only one oval.*

- Comet tail artefact
- Mirror image artefact
- Acoustic shadowing artefact
- Acoustic enhancement artefact
- Don't know

5. Select the type of artefact indicated by the marks in this ultrasound image. \*

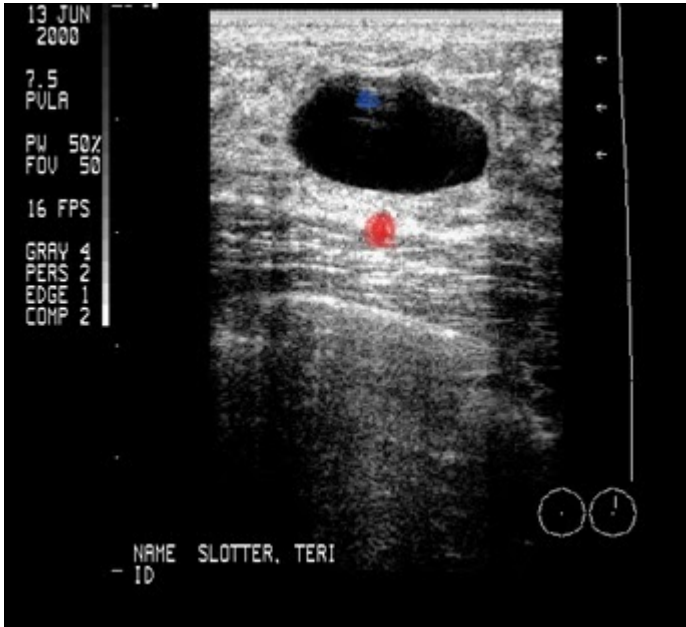

Mark only one oval per row.

|          | Comet tail artefact   | Mirror image artefact | Acoustic enhancement artefact | Acoustic shadowing artefact | Reverberation artefact |
|----------|-----------------------|-----------------------|-------------------------------|-----------------------------|------------------------|
| blue dot | <input type="radio"/> | <input type="radio"/> | <input type="radio"/>         | <input type="radio"/>       | <input type="radio"/>  |
| Red dot  | <input type="radio"/> | <input type="radio"/> | <input type="radio"/>         | <input type="radio"/>       | <input type="radio"/>  |

6. Regarding the frequency of ultrasound waves in tissues, which is CORRECT? \*

Mark only one oval.

- Lower frequency waves are best for viewing fine detail.
- Increasing frequency will improve tissue penetration.
- Frequency is inversely proportionate to wavelength.
- Increasing frequency will increase velocity of the sound wave.
- Don't know

7. Which of the following is NOT a sign of acute cholecystitis?

Mark only one oval.

- Thickening of the wall of GB
- Fluid around the GB
- A contracted GB
- Pain under the US probe by using compression technique
- Don't know

8. The following are the various views of FOCUS. Choose the correct name of their views: \*

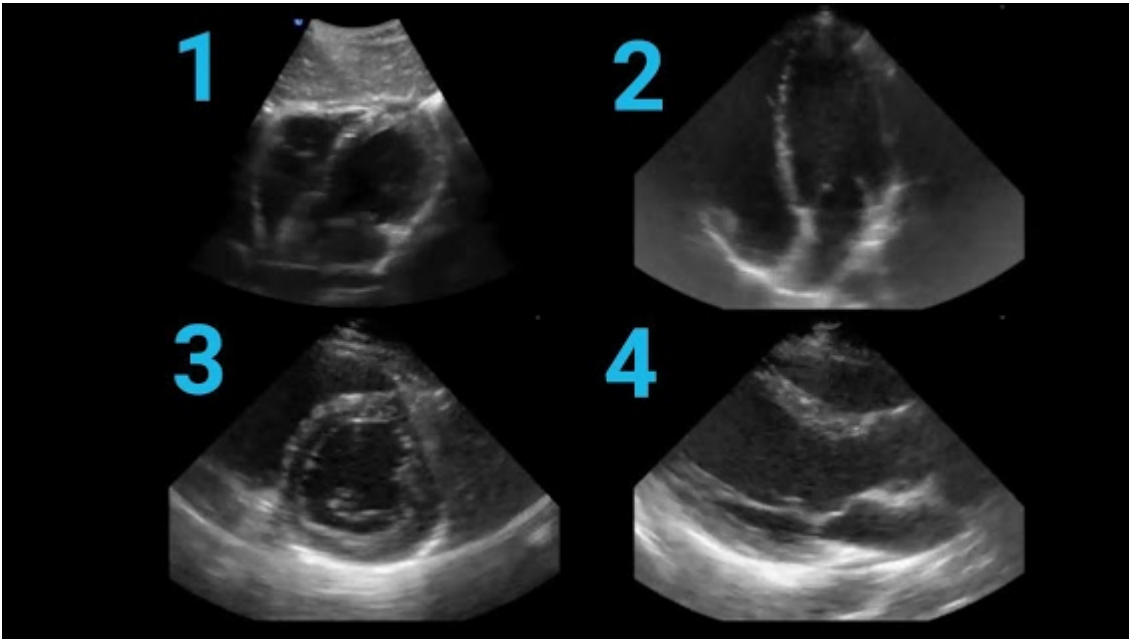

Mark only one oval per row.

|   | Parasternal long axis | Parasternal short axis | Apical 4 chamber      | Subxiphoid            | Dont know             |
|---|-----------------------|------------------------|-----------------------|-----------------------|-----------------------|
| 1 | <input type="radio"/> | <input type="radio"/>  | <input type="radio"/> | <input type="radio"/> | <input type="radio"/> |
| 2 | <input type="radio"/> | <input type="radio"/>  | <input type="radio"/> | <input type="radio"/> | <input type="radio"/> |
| 3 | <input type="radio"/> | <input type="radio"/>  | <input type="radio"/> | <input type="radio"/> | <input type="radio"/> |
| 4 | <input type="radio"/> | <input type="radio"/>  | <input type="radio"/> | <input type="radio"/> | <input type="radio"/> |

9. With regards to EFAST examination in trauma, the following M-mode lung ultrasound shows \_\_\_\_\_. (Please select the CORRECT response) \*

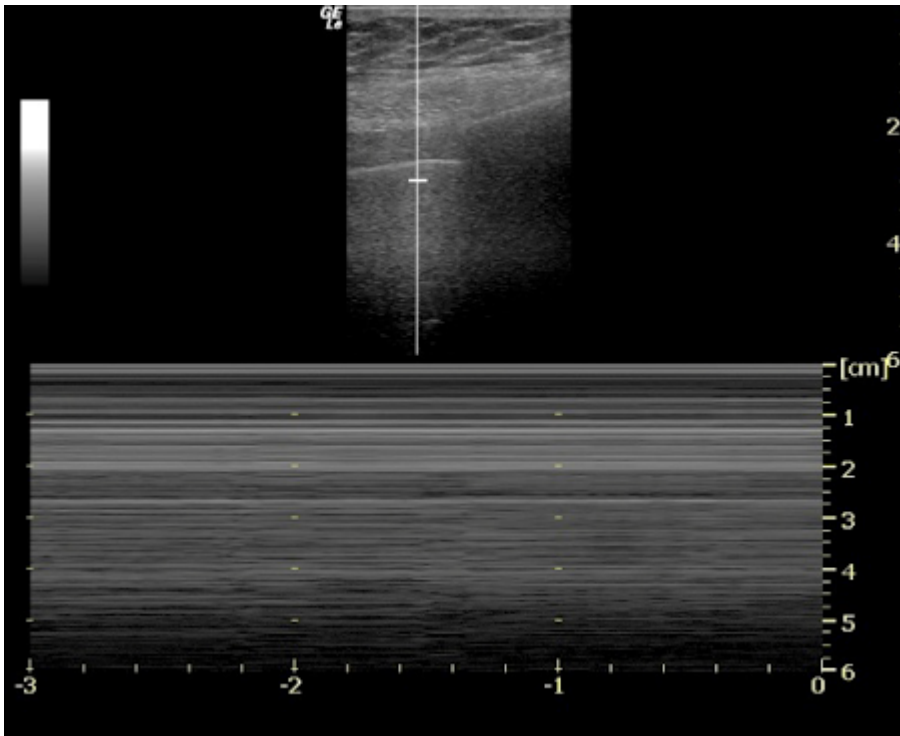

Mark only one oval.

- The 'seashore' sign, which indicates a pneumothorax
- The 'seashore' sign, which indicates normal lung and no pneumothorax
- The 'stratosphere' or 'bar code' sign, which indicates a pneumothorax
- The 'stratosphere' or 'bar-code' sign, which indicates normal lung and no pneumothorax
- Don't know

10. With regards to EFAST examination in trauma, this RUQ view shows \_\_\_\_\_.  
(Please select the CORRECT response) \*

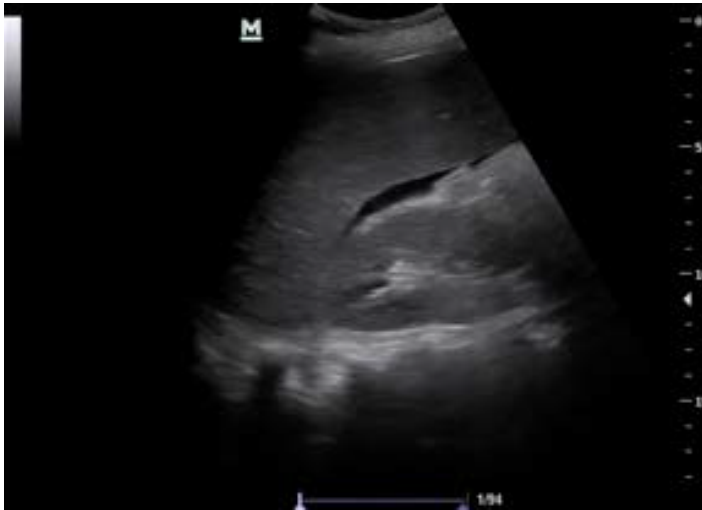

*Mark only one oval.*

- A liver laceration
- Inadequate views of the RUQ to interpret the EFAST image
- Free fluid in Morrison's pouch
- Blood in the pouch of Douglas
- Don't know





12. A 42 years old woman presents to ED with SOB. FOCUS was performed which shows the following in parasternal short-axis view. What does it signify? \*

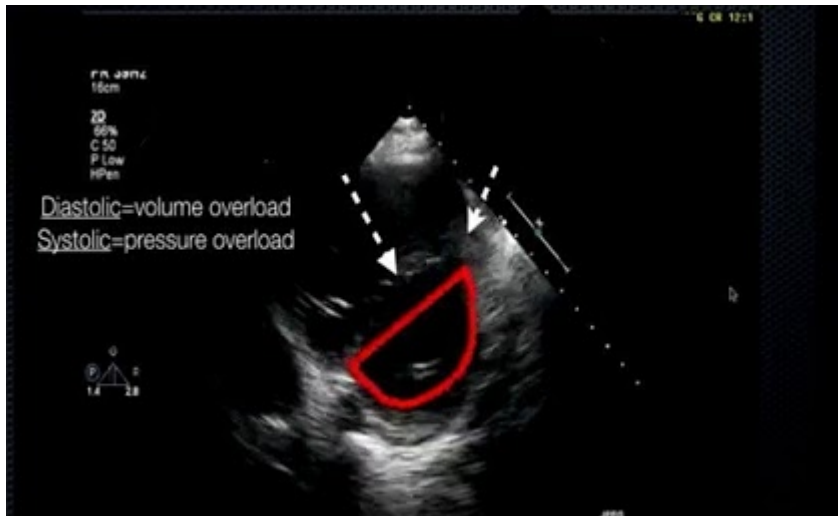

Mark only one oval.

- Left heart strain
- Right heart strain
- Dissecting aortic aneurysm
- Pericardial effusion
- Dont know

13. Which wall does the green-colored wall reflect in the apical 2 chamber view? \*

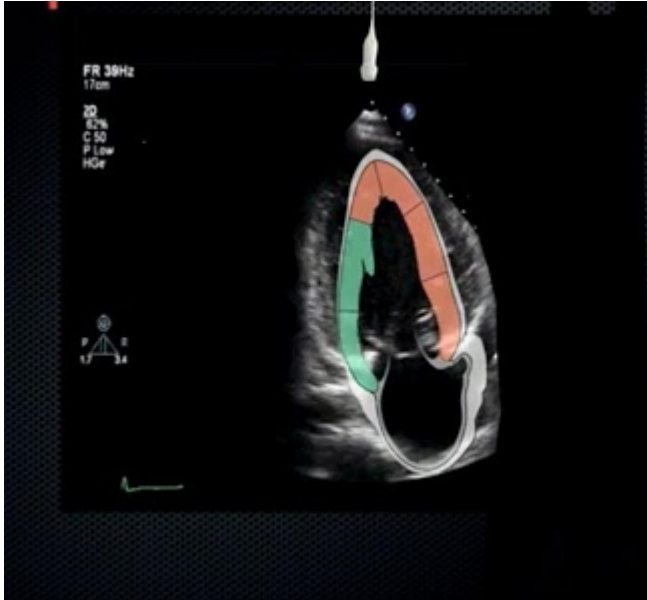

Mark only one oval.

- Septal
- Inferior
- Posterior
- Lateral
- Don't know

A 42 years old male with dyspnoea. This is the image obtained at the left lower chest.

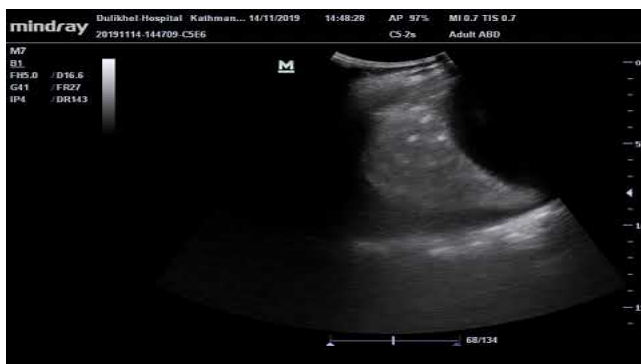

<http://youtube.com/watch?v=a7Sy8oT5wWg>

14. What does it show? \*

Mark only one oval.

- Calcified spleen with free fluid in the adomen
- Pneumonia with pleural effusion
- Pneumothorax
- Pericardial effision
- Don't know

15. A 60 years old woman presents to ED with dyspnoea. The above image is obtained from the bases of both lungs. What is your best interpretation? \*

Mark only one oval.

- Pneumothorax
- Pulmonary edema
- Pneumonia
- Pleural effusion
- Don't know

Patient with abdominal pain and vomiting. POCUS was performed.

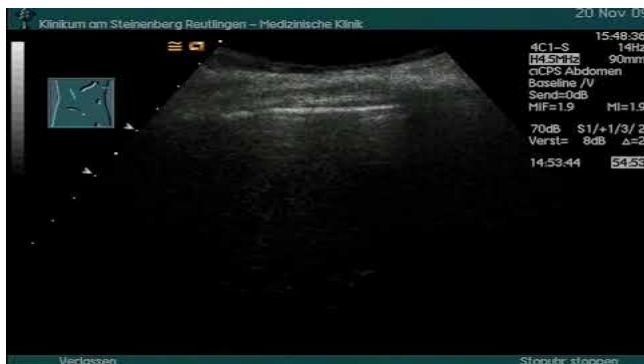

<http://youtube.com/watch?v=I0AEDIGNBSg>

16. What can you see in the video? \*

*Mark only one oval.*

- Free abdominal fluid
- Free abdominal air
- Normal finding
- Gas inside the intestine
- Don't know

17. Identify the structure marked with a blue dot in the following image. \*

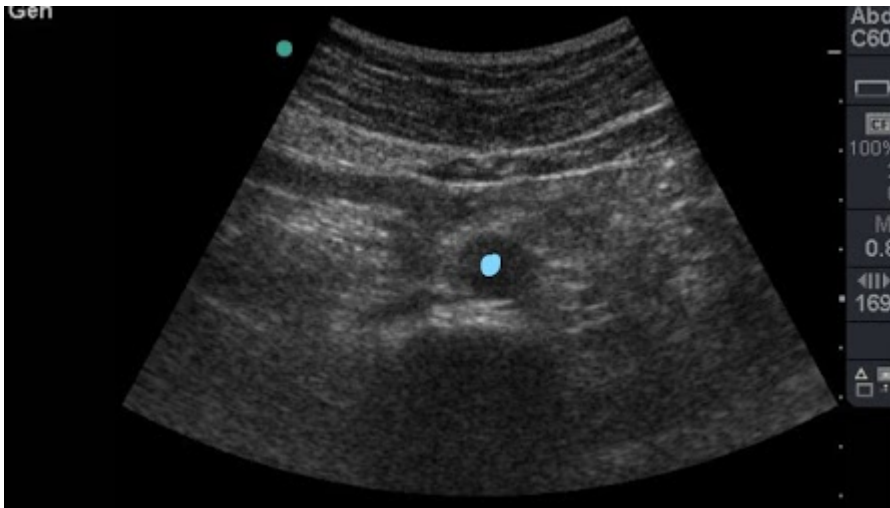

*Mark only one oval.*

- Inferior vana cava
- Aorta
- Bowel
- Superior Mesenteric artery
- Don't know

18. A 60 Yrs female with history of diarrhoea and vomiting presented to your ED. She has known cardiac disease in the past. The image of her IVC is shown in the following figure which shows no respiratory variation. How would you treat the patient? \*

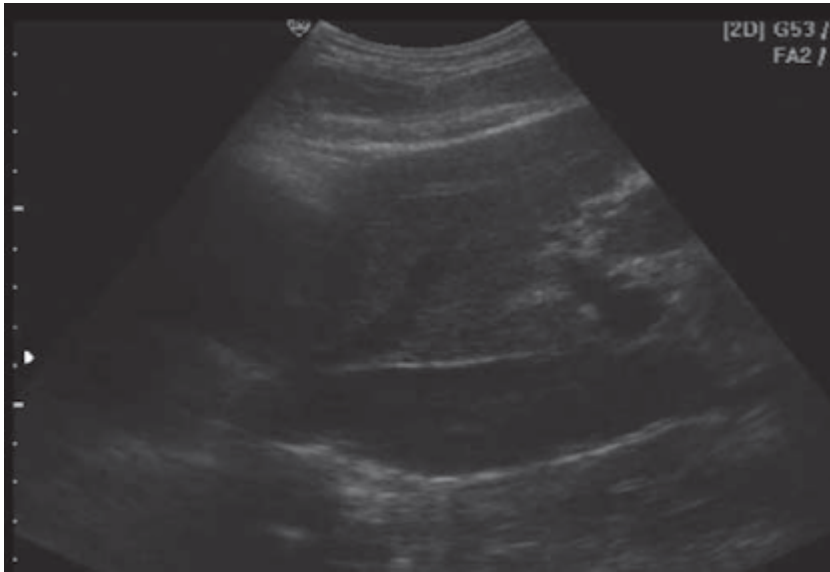

Mark only one oval.

- The patient needs more IV fluid as she is dehydrated
- Fluids should be restricted in this lady
- Consultation of a vascular surgeon is immediately required
- The measurement of IVC is not important in this case
- Don't know.

A 20 years old boy visited ED with left scrotal pain.

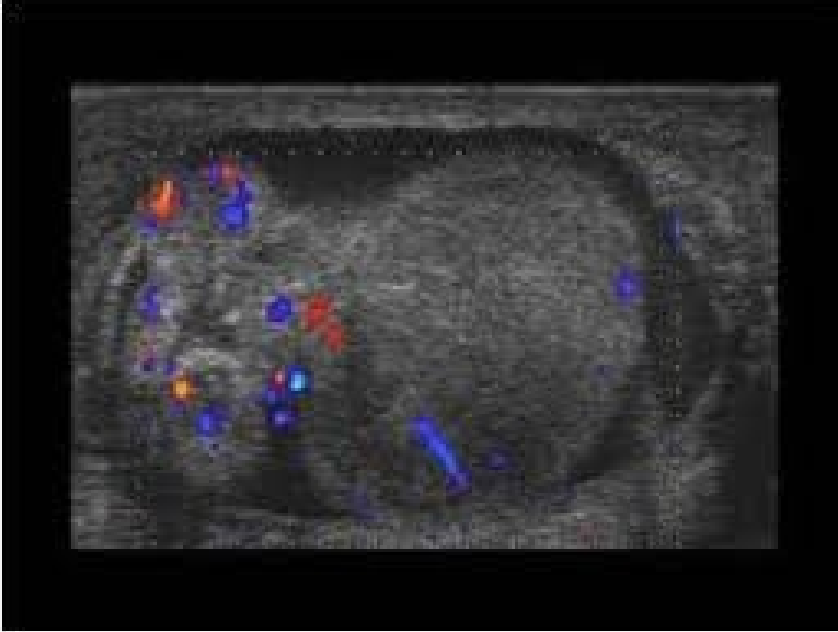

19. What does the POCUS image show? \*

*Mark only one oval.*

- Normal scrotum
- Epididymoorchitis
- Torsion of the testis
- Infected hydrocele
- Don't know

20. Which vessel helps to find the pancreas? \*

*Mark only one oval.*

- Portal vein
- Splenic vein
- Superior mesenteric artery
- Coeliac trunk
- Don't know

21. What is the vessel in blue dot shown in the image gained from the inguinal region. \*

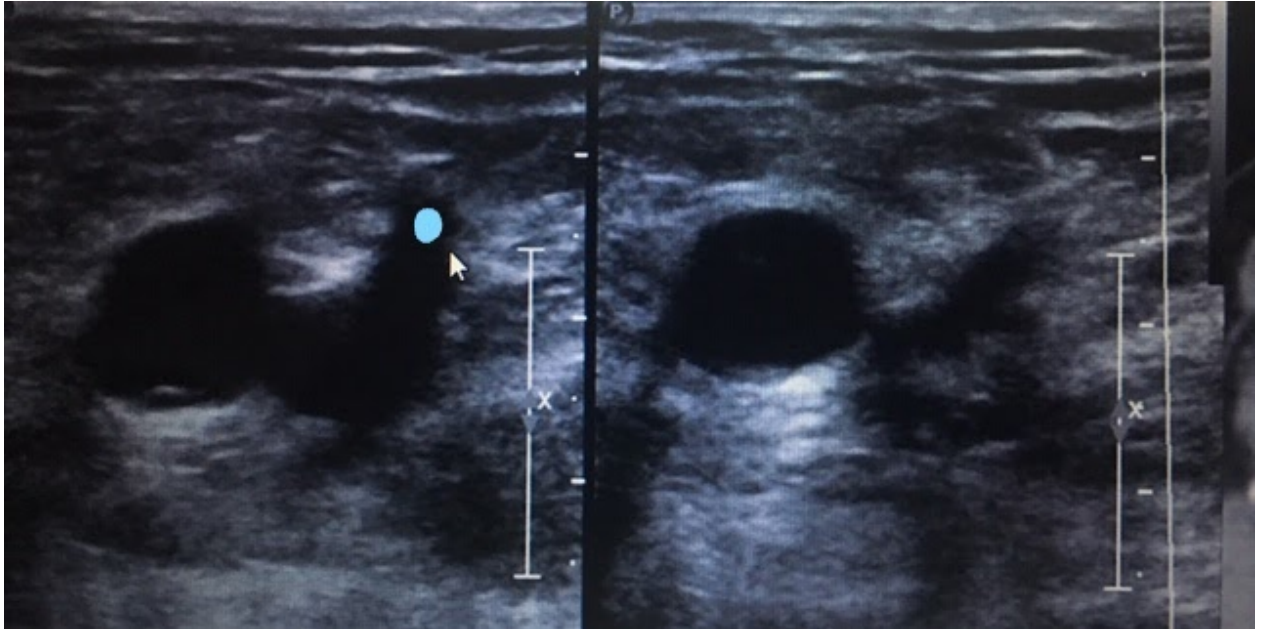

Mark only one oval.

- Femoral vein
- Superficial Femoral artery
- Deep femoral artery
- Great saphenous vein
- Don't know

---

This content is neither created nor endorsed by Google.

Google Forms

# Feedback for Advanced Interdisciplinary Emergency Ultrasound Workshop 2019@ Dhulikhel Hospital

Dear Participants we really appreciate your enthusiastic participation in the workshop. Please fill the following survey form which will guide us for future similar workshops.

## 1. Email address \*

---

## 2. Relevance to practice

*Mark only one oval.*

|                   |                       |                       |                       |                       |                       |                |
|-------------------|-----------------------|-----------------------|-----------------------|-----------------------|-----------------------|----------------|
|                   | 1                     | 2                     | 3                     | 4                     | 5                     |                |
| strongly disagree | <input type="radio"/> | strongly agree |

---

## 3. Content (selection of topics)

*Mark only one oval.*

|      |                       |                       |                       |                       |                       |             |
|------|-----------------------|-----------------------|-----------------------|-----------------------|-----------------------|-------------|
|      | 1                     | 2                     | 3                     | 4                     | 5                     |             |
| poor | <input type="radio"/> | exceptional |

---

## 4. Venue

*Mark only one oval.*

|      |                       |                       |                       |                       |                       |             |
|------|-----------------------|-----------------------|-----------------------|-----------------------|-----------------------|-------------|
|      | 1                     | 2                     | 3                     | 4                     | 5                     |             |
| poor | <input type="radio"/> | exceptional |

---

## 5. Registration process

*Mark only one oval.*

|      |                       |                       |                       |                       |                       |             |
|------|-----------------------|-----------------------|-----------------------|-----------------------|-----------------------|-------------|
|      | 1                     | 2                     | 3                     | 4                     | 5                     |             |
| poor | <input type="radio"/> | exceptional |

---

## 6. Food

*Mark only one oval.*

|      |                       |                       |                       |                       |                       |             |
|------|-----------------------|-----------------------|-----------------------|-----------------------|-----------------------|-------------|
|      | 1                     | 2                     | 3                     | 4                     | 5                     |             |
| poor | <input type="radio"/> | exceptional |

---



**7. Overall quality of activities and organization**

*Mark only one oval.*

|      |                       |                       |                       |                       |                       |             |
|------|-----------------------|-----------------------|-----------------------|-----------------------|-----------------------|-------------|
|      | 1                     | 2                     | 3                     | 4                     | 5                     |             |
| poor | <input type="radio"/> | exceptional |

**8. Open feedback and comments for this workshop!**

---

---

---

---

---

**9. Would you like to attend similar workshop in future?**

*Mark only one oval.*

yes

No

**10. Enlist the topics you would like to cover for future workshops.**

---

---

---

---

---

**11. Please suggest/ comment for future program**

---

---

---

---

---

**12. Overall oral presentations**

*Mark only one oval.*

|      |                       |                       |                       |                       |                       |             |
|------|-----------------------|-----------------------|-----------------------|-----------------------|-----------------------|-------------|
|      | 1                     | 2                     | 3                     | 4                     | 5                     |             |
| poor | <input type="radio"/> | exceptional |

**13. Skills stations**

*Mark only one oval.*

|      |                       |                       |                       |                       |                       |             |
|------|-----------------------|-----------------------|-----------------------|-----------------------|-----------------------|-------------|
|      | 1                     | 2                     | 3                     | 4                     | 5                     |             |
| poor | <input type="radio"/> | exceptional |

**Pre and Post-workshop confidence level:**

Using the scale of 1-5, 1 being the least and 5 being the most, what is your confidence level in managing :

**Untitled section**

**14. Basic ultrasound skills**

*Mark only one oval per row.*

|               |                       |                       |                       |                       |                       |
|---------------|-----------------------|-----------------------|-----------------------|-----------------------|-----------------------|
|               | 1                     | 2                     | 3                     | 4                     | 5                     |
| Pre-workshop  | <input type="radio"/> |
| Post-workshop | <input type="radio"/> |

**15. Focused Cardiac Ultrasound**

*Mark only one oval per row.*

|               |                       |                       |                       |                       |                       |
|---------------|-----------------------|-----------------------|-----------------------|-----------------------|-----------------------|
|               | 1                     | 2                     | 3                     | 4                     | 5                     |
| Pre-workshop  | <input type="radio"/> |
| Post-workshop | <input type="radio"/> |

**16. Lung Ultrasound**

*Mark only one oval per row.*

|               |                       |                       |                       |                       |                       |
|---------------|-----------------------|-----------------------|-----------------------|-----------------------|-----------------------|
|               | 1                     | 2                     | 3                     | 4                     | 5                     |
| Pre-workshop  | <input type="radio"/> |
| Post-workshop | <input type="radio"/> |

**17. Rapid ultrasound for Shock and Hypotension (RUSH)**

*Mark only one oval per row.*

|               |                       |                       |                       |                       |                       |
|---------------|-----------------------|-----------------------|-----------------------|-----------------------|-----------------------|
|               | 1                     | 2                     | 3                     | 4                     | 5                     |
| Pre-workshop  | <input type="radio"/> |
| Post-workshop | <input type="radio"/> |

**18. E-FAST during trauma with ABCDE approach**

*Mark only one oval per row.*

|               |                       |                       |                       |                       |                       |
|---------------|-----------------------|-----------------------|-----------------------|-----------------------|-----------------------|
|               | 1                     | 2                     | 3                     | 4                     | 5                     |
| Pre-workshop  | <input type="radio"/> |
| Post-workshop | <input type="radio"/> |

**19. Focused ultrasound of abdomen(free air/free fluid/ileus/appendicitis/abscess)**

*Mark only one oval per row.*

|               | 1                     | 2                     | 3                     | 4                     | 5                     |
|---------------|-----------------------|-----------------------|-----------------------|-----------------------|-----------------------|
| Pre-workshop  | <input type="radio"/> |
| Post-workshop | <input type="radio"/> |

**20. Focused ultrasound of abdomen (hepatobiliary/pancreas/stones)**

*Mark only one oval per row.*

|               | 1                     | 2                     | 3                     | 4                     | 5                     |
|---------------|-----------------------|-----------------------|-----------------------|-----------------------|-----------------------|
| Pre-workshop  | <input type="radio"/> |
| Post-workshop | <input type="radio"/> |

**21. Ultrasound of the scrotum**

*Mark only one oval per row.*

|               | 1                     | 2                     | 3                     | 4                     | 5                     |
|---------------|-----------------------|-----------------------|-----------------------|-----------------------|-----------------------|
| Pre-workshop  | <input type="radio"/> |
| Post-workshop | <input type="radio"/> |

**22. Focused ultrasound in gynecology**

*Mark only one oval per row.*

|               | 1                     | 2                     | 3                     | 4                     | 5                     |
|---------------|-----------------------|-----------------------|-----------------------|-----------------------|-----------------------|
| Pre-workshop  | <input type="radio"/> |
| Post-workshop | <input type="radio"/> |

**23. Vascular ultrasound**

*Mark only one oval per row.*

|               | 1                     | 2                     | 3                     | 4                     | 5                     |
|---------------|-----------------------|-----------------------|-----------------------|-----------------------|-----------------------|
| Pre-workshop  | <input type="radio"/> |
| Post-workshop | <input type="radio"/> |

**24. Musculoskeletal ultrasound**

*Mark only one oval per row.*

|               | 1                     | 2                     | 3                     | 4                     | 5                     |
|---------------|-----------------------|-----------------------|-----------------------|-----------------------|-----------------------|
| Pre-workshop  | <input type="radio"/> |
| Post-workshop | <input type="radio"/> |

**25. Ultrasound guided interventions**

*Mark only one oval per row.*

|               | 1                     | 2                     | 3                     | 4                     | 5                     |
|---------------|-----------------------|-----------------------|-----------------------|-----------------------|-----------------------|
| Pre-workshop  | <input type="radio"/> |
| Post-workshop | <input type="radio"/> |

**Pre- and Post-workshop perceived usefulness in daily clinical practice**

Using the scale of 1-5, 1 being the least and 5 being the most, what is your perceived level of usefulness of POCUS in :

**26. Trauma**

*Mark only one oval per row.*

|               | 1                     | 2                     | 3                     | 4                     | 5                     |
|---------------|-----------------------|-----------------------|-----------------------|-----------------------|-----------------------|
| Pre-workshop  | <input type="radio"/> |
| Post-workshop | <input type="radio"/> |

**27. Dyspnoe**

*Mark only one oval per row.*

|               | 1                     | 2                     | 3                     | 4                     | 5                     |
|---------------|-----------------------|-----------------------|-----------------------|-----------------------|-----------------------|
| Pre-workshop  | <input type="radio"/> |
| Post-workshop | <input type="radio"/> |

**28. Undifferentiated Shock**

*Mark only one oval per row.*

|               | 1                     | 2                     | 3                     | 4                     | 5                     |
|---------------|-----------------------|-----------------------|-----------------------|-----------------------|-----------------------|
| Pre-workshop  | <input type="radio"/> |
| Post-workshop | <input type="radio"/> |

**29. Acute chest pain**

*Mark only one oval per row.*

|               | 1                     | 2                     | 3                     | 4                     | 5                     |
|---------------|-----------------------|-----------------------|-----------------------|-----------------------|-----------------------|
| Pre-workshop  | <input type="radio"/> |
| Post-workshop | <input type="radio"/> |

**30. Acute abdomen**

*Mark only one oval per row.*

|               | 1                     | 2                     | 3                     | 4                     | 5                     |
|---------------|-----------------------|-----------------------|-----------------------|-----------------------|-----------------------|
| Pre-workshop  | <input type="radio"/> |
| Post-workshop | <input type="radio"/> |

**31. Acute scrotal pain and/or swelling**

*Mark only one oval per row.*

|               | 1                     | 2                     | 3                     | 4                     | 5                     |
|---------------|-----------------------|-----------------------|-----------------------|-----------------------|-----------------------|
| Pre-workshop  | <input type="radio"/> |
| Post-workshop | <input type="radio"/> |

**32. Gynecological emergencies**

*Mark only one oval per row.*

|               | 1                     | 2                     | 3                     | 4                     | 5                     |
|---------------|-----------------------|-----------------------|-----------------------|-----------------------|-----------------------|
| Pre-workshop  | <input type="radio"/> |
| Post-workshop | <input type="radio"/> |

**33. Vascular Emergencies**

*Mark only one oval per row.*

|               | 1                     | 2                     | 3                     | 4                     | 5                     |
|---------------|-----------------------|-----------------------|-----------------------|-----------------------|-----------------------|
| Pre-workshop  | <input type="radio"/> |
| Post-workshop | <input type="radio"/> |

**34. Acute Musculoskeletal problems**

*Mark only one oval per row.*

|               | 1                     | 2                     | 3                     | 4                     | 5                     |
|---------------|-----------------------|-----------------------|-----------------------|-----------------------|-----------------------|
| Pre-workshop  | <input type="radio"/> |
| Post-workshop | <input type="radio"/> |

**35. Procedures/ interventions**

*Mark only one oval per row.*

|               | 1                     | 2                     | 3                     | 4                     | 5                     |
|---------------|-----------------------|-----------------------|-----------------------|-----------------------|-----------------------|
| Pre-workshop  | <input type="radio"/> |
| Post-workshop | <input type="radio"/> |

Send me a copy of my responses.

# Follow-up form

Dear Participants we hope it was a fruitful learning experience! Kindly fill in the form to reflect your experience after the workshop. The information provided will be confidential!

\*Required

1. **Email address \***

---

2. **Affiliated organization \***

---

3. **Do you have an ultrasound machine in your workplace now? \***

*Mark only one oval.*

Yes

No

4. **How often do you use USG machine in your clinical practice per week? \***

*Mark only one oval per row.*

|               | Never                 | 1-5 times             | 5- 10 times           | 10-15 times           | >15 times             |
|---------------|-----------------------|-----------------------|-----------------------|-----------------------|-----------------------|
| Pre-workshop  | <input type="radio"/> |
| Post-workshop | <input type="radio"/> |

5. **What are the barriers to the use of ultrasound in your workplace at present?**

---

---

---

---

---

## Experience

Using the scale of 1-5, 1 being the NEVER and 5 being FREQUENTLY, how often have you performed the following in your daily clinical practice?

6. **E-FAST during trauma with ABCDE approach \***

*Mark only one oval per row.*

|              | 1                     | 2                     | 3                     | 4                     | 5                     |
|--------------|-----------------------|-----------------------|-----------------------|-----------------------|-----------------------|
| preworkshop  | <input type="radio"/> |
| postworkshop | <input type="radio"/> |

**7. Focused Cardiac Ultrasound \***

*Mark only one oval per row.*

|              | 1                     | 2                     | 3                     | 4                     | 5                     |
|--------------|-----------------------|-----------------------|-----------------------|-----------------------|-----------------------|
| preworkshop  | <input type="radio"/> |
| postworkshop | <input type="radio"/> |

**8. Lung Ultrasound \***

*Mark only one oval per row.*

|              | 1                     | 2                     | 3                     | 4                     | 5                     |
|--------------|-----------------------|-----------------------|-----------------------|-----------------------|-----------------------|
| preworkshop  | <input type="radio"/> |
| postworkshop | <input type="radio"/> |

**9. Rapid ultrasound for shock and hypotension (RUSH) \***

*Mark only one oval per row.*

|              | 1                     | 2                     | 3                     | 4                     | 5                     |
|--------------|-----------------------|-----------------------|-----------------------|-----------------------|-----------------------|
| preworkshop  | <input type="radio"/> |
| postworkshop | <input type="radio"/> |

**10. Focused ultrasound of abdomen (free air/free fluid/ileus/appendicitis/abscess) \***

*Mark only one oval per row.*

|              | 1                     | 2                     | 3                     | 4                     | 5                     |
|--------------|-----------------------|-----------------------|-----------------------|-----------------------|-----------------------|
| preworkshop  | <input type="radio"/> |
| postworkshop | <input type="radio"/> |

**11. Focused ultrasound of abdomen (hepatobiliary/pancreas/stones) \***

*Mark only one oval per row.*

|              | 1                     | 2                     | 3                     | 4                     | 5                     |
|--------------|-----------------------|-----------------------|-----------------------|-----------------------|-----------------------|
| preworkshop  | <input type="radio"/> |
| postworkshop | <input type="radio"/> |

**12. Ultrasound of the scrotum \***

*Mark only one oval per row.*

|              | 1                     | 2                     | 3                     | 4                     | 5                     |
|--------------|-----------------------|-----------------------|-----------------------|-----------------------|-----------------------|
| preworkshop  | <input type="radio"/> |
| postworkshop | <input type="radio"/> |

**13. Focused ultrasound in gynecology \***

*Mark only one oval per row.*

|              | 1                     | 2                     | 3                     | 4                     | 5                     |
|--------------|-----------------------|-----------------------|-----------------------|-----------------------|-----------------------|
| preworkshop  | <input type="radio"/> |
| postworkshop | <input type="radio"/> |

**14. Vascular ultrasound \***

*Mark only one oval per row.*

|              | 1                     | 2                     | 3                     | 4                     | 5                     |
|--------------|-----------------------|-----------------------|-----------------------|-----------------------|-----------------------|
| preworkshop  | <input type="radio"/> |
| postworkshop | <input type="radio"/> |

**15. Musculoskeletal ultrasound \***

*Mark only one oval per row.*

|              | 1                     | 2                     | 3                     | 4                     | 5                     |
|--------------|-----------------------|-----------------------|-----------------------|-----------------------|-----------------------|
| preworkshop  | <input type="radio"/> |
| postworkshop | <input type="radio"/> |

**16. Ultrasound-guided interventions (e.g. Vascular access, FB removal) \***

*Mark only one oval per row.*

|              | 1                     | 2                     | 3                     | 4                     | 5                     |
|--------------|-----------------------|-----------------------|-----------------------|-----------------------|-----------------------|
| preworkshop  | <input type="radio"/> |
| postworkshop | <input type="radio"/> |

**17. Any other focused ultrasound you have been practicing other than those mention above?**

\_\_\_\_\_
